# Supplementary material for: Derivation of stationary distributions of biochemical reaction networks via structure transformation
Source: Springer Nature journal article supplement (doi:10.1038/s42003-021-02117-x), 2021-05-24
Supplement: 42003_2021_2117_MOESM1_ESM.pdf [file 42003_2021_2117_MOESM1_ESM.pdf]

*This manuscript has been previously reviewed at another Nature Research journal. This document only contains reviewer comments and rebuttal letters for versions considered at Communications Biology.*
