# Supplementary material for: Derivation of stationary distributions of biochemical reaction networks via structure transformation
Source: Springer Nature journal article supplement (doi:10.1038/s42003-021-02117-x), 2021-05-24
Supplement: 42003_2021_2117_MOESM3_ESM.pdf [file 42003_2021_2117_MOESM3_ESM.pdf]

## **Description of Additional Supplementary Files**

**File Name:** Supplementary Data 1

**Description:** Simulation data underlying plots shown in Figures 3 and 4.
